# Supplementary material for: Cathepsin D in prawn reproductive system: its localization and function in actin degradation
Source: PeerJ journal article supplement (doi:10.7717/peerj.10218), 2020-11-11
Supplement: Suppl_Fig_1_Full_sequence_and_primers.pdf [file Suppl_Fig_1_Full_sequence_and_primers.pdf]

## **Supplementary Figure 1** Full sequence of MrCAT-D and primer design

>KP262355.1 *Macrobrachium rosenbergii* cathepsin-D (CAT-D) mRNA, complete cds

AGCCAACACCTGACGCTGACAGCTTCTCTACATGCACACTGCACAGTCGAGACTTCATTCTTCTTCTCGC  
TATATCGTTGGTCTCTGTTTCTTTGTACTCTGGTGCTGAGGATGAAGGTGTTGATTTTACTGGCCCTGGT  
GGCTCTTGCCACTTCGGAATTTACAGAATTCATTGCGAAAATTTAAATCTGCCAGGCAGAGTTTGAGA  
GAAGTAGACACCTCCATAAACTTACACGCCGCCGATGGGGAAATGGAGGTCCCTATGCCCGAGCCTCTGT  
CAAATTACATGGATGCACAGTACTATGGACCGATCAGCATTGGCACTCCTCCTCAGTCTTTAGAGTTGT  
ATTTGACACTGGCTCATCCAATCTCTGGGTTCCCTTCCAAGCAGTGCCACTTTACCAATATTGCTTGCTTA  
ATTACAAATAAGTACGATTACGTAAGTCATCAACATACAAGAAGAAATGGGACTGAATTTGCTATCCAGT  
ATGGATCAGGGTCACTCTCAGGTTACTTGTCCACAGACACAGTTAGTGTTGGTTCAGTAGTTGTGAAAGA  
CCAGACATTTGCAGAAGCTTTAAGTGAACCAGGAATGGCTTTTGTTCAGCGAAGTTTGATGGTATTCTT  
GGTATGGCCTATGACAGAATTGCAGTTGATGGAGTTACTCCTGTTTTCTACAATATGGTTAGCCAAAAGC  
TTGTGCCAGCTCCAGTCTTCAGCTTCTATCTTAATAGAGATCCTAGTGCTCCTGAGGGTGGTGAGTTAAT  
TCTTGGAGGTTCTGACCCAAAATACTATAAGGGAGACTTTACTTACCTACCAGTTGATCGTCAGGGCTAC  
TGGCAGTTCAAATGGACGGAGTGCAAATAGATGGAGCTGATGTTCCCTGTCTGTACGGGTGGTTGTGAAG  
CTATTGCTGATACTGGCACCTCACTCATTGCTGCCCCCTCAGAGGAAGCTCGTCTTATCAACAAGAAGAT  
TGGTGCTAAGCCATTATTGTTGGTGGAGAGTGGATGGTTGACTGTGATCTTATTCCCAATCTTCTACTATT  
TCATTTGTATTGAATGGGAAGCCATTTACCCTGGAAGGCAAAGACTACATTCAGGGTGAGTCAGTTTG  
GAAAGACAACCTGCCTCTCTGGATTCAATTGGACTTGATGTACCTCCACCCATGGGCCCCATGTGGATTCT  
GGGTGATGTCTTCATTGGTCGATTCTACACTGAGTTTGACATGGAAAACAACAGGGTTGGCTTTGCCACT  
GCTGCCTAGAAAGGAGCAAAGCAAAACCCTCTAGGTTTGTGCTTTGTTTCATCATTACTTCAGAAATTA  
AAGTTTATCATCCCCAAAAAAAAAAAAAAAAAAAA
