# Supplementary material for: Cathepsin D in prawn reproductive system: its localization and function in actin degradation
Source: PeerJ journal article supplement (doi:10.7717/peerj.10218), 2020-11-11
Supplement: Suppl_Fig_2_Alignment_of_Antigen.pdf [file Suppl_Fig_2_Alignment_of_Antigen.pdf]

**Supplementary Figure 2** Alignment of human heavy chain (NP\_001900.1:169-412) and heavy chain of *Macrobrachium rosenbergii* CAT\_D (AMQ98967.1:118-385) by Clustal Omega Program

---

```

H.sapiens          -----LGGVKVERQVFGEATKQPGITFIAAKFDGILGMAY 35
M.rosenbergii     KNGTEFAIQYGSGLSGYLSTDTVSVGSVVVKDQTFAEALSEPGMAFVAAKFDGILGMAY 60
                   :*. * *: *. *.** .:***:*.:*****

H.sapiens          PRISVNNVLPVFDNLMQQKLVLDQNIFSFYLSRDPDAQPGGELMLGGTDSKYKGSLSYLN 95
M.rosenbergii     DRIAVDGVTPVFFYNMVSQKLVPAVFSFYLNRPDPSAPEGGELILGGSDPKYKGFYLP 120
                   **:*.:. * ** *:.:***** :*****.***.* ****:***:* *****.:**

H.sapiens          VTRKAYWQVHLDQVEVA-SGLTLCKEGCEAIVDTGTSLMVGFPVDEVRELQKAIGAVPLIQ 154
M.rosenbergii     VDRQGYWQFKMDGVQIDGADVPCVTGGCEAIADTGTSLIAAPSEEARLINKKIGAKPIVG 180
                   * *.:***.:** *:.: .:.: *. *****.*****:..* :*. * :.* ** *:.:

H.sapiens          GEYMIPCEKVSTLPAITLKLGGKGYKLSPEYTLKVSQAGKTLCLSGFMGMDIPPPSGPL 214
M.rosenbergii     GEWMVDCDLIPNLPTISFVLNGKPFVLETKDYILRVSQFGKTTCLSGFIGLDVPPPMGPM 240
                   **:*. * : .**:*:. *.** :. . :** *:*** ** *****:*.:** ** *:.:

H.sapiens          WILGDVFIGRYTTFDRDNNRVGFAEAAARL 244
M.rosenbergii     WILGDVFIGRFYTEFDMENNRVGFATAA-- 268
                   *****:.* ** :***** **

```
