# Supplementary material for: Cathepsin D in prawn reproductive system: its localization and function in actin degradation
Source: PeerJ. 2020 Nov 11;8:e10218. doi: 10.7717/peerj.10218 (PMC7666547; doi:10.7717/peerj.10218)
Supplement: Supplemental Information 3 [file peerj-08-10218-s003.xlsx]

## Sheet: Sheet1
Figure 3B
Average density of PCR bands in tissues
	Mean	SD
Testis	24503.8	11102.2
Vas deferens	21207.5	15856.5
Terminal ampoule	18289.9	13033.7
Muscle	20202.8	12562.8
Hepatopancreas	26041.9	15282.9
Stomach	23119.3	5256.15
Heart	28348.4	12235.8
Gill	31846.9	16598.7
