# Supplementary material for: Cathepsin D in prawn reproductive system: its localization and function in actin degradation
Source: PeerJ. 2020 Nov 11;8:e10218. doi: 10.7717/peerj.10218 (PMC7666547; doi:10.7717/peerj.10218)
Supplement: Supplemental Information 4 [file peerj-08-10218-s004.xlsx]

## Sheet: Sheet1
Figure 3D
Average density of PCR bands in Sperm
	Mean	SD
Tsp	27951.5	17795.8
Vsp	22189.1	16040.2
Ssp	16721.8	8868.06
