# Supplementary material for: Cathepsin D in prawn reproductive system: its localization and function in actin degradation
Source: PeerJ. 2020 Nov 11;8:e10218. doi: 10.7717/peerj.10218 (PMC7666547; doi:10.7717/peerj.10218)
Supplement: Supplemental Information 5 [file peerj-08-10218-s005.xlsx]

## Sheet: Sheet1
Figure 5A
Enzyme activity of TE and Tsp with and without pepstatin-A at different time points
	TE		TE+PepA		Tsp		Tsp+pepA
Times	Mean	SE	Mean	SE	Mean	SE	Mean	SE
5	27589.5	904.39	4314.5	157.685	24970.5	208.597	3512	304.056
10	31442	69.2965	4925.5	391.03	27704.5	3079.45	3607	272.943
20	35424.5	74.2462	4965	479.418	30145.5	303.349	3623	289.914
30	37743.5	1293.3	4839	270.115	32905	2885	3610	251.73
40	39060.5	1453.1	4846	349.311	34635.5	423.557	3726.5	184.555
50	42597.5	1294.71	4926.5	243.952	34917	2268.4	3614.5	224.153
60	47268	584.07	4815.5	318.905	39009	912.168	3646.5	238.295
