# Supplementary material for: Cathepsin D in prawn reproductive system: its localization and function in actin degradation
Source: PeerJ. 2020 Nov 11;8:e10218. doi: 10.7717/peerj.10218 (PMC7666547; doi:10.7717/peerj.10218)
Supplement: Supplemental Information 6 [file peerj-08-10218-s006.xlsx]

## Sheet: Sheet1
Figure 5B
Specific activity of TE and Tsp with and without pepstatin-A at 60 min
	Mean	SE	P-value (t-test)
TE	57.8319	2.65	NA
Tsp+PepA	34.9179	3.87438	0.000536019
TE+PepA	3.9826	0.204059	1.96757e-06
Tsp+PepA	2.4269	0.206419	6.56843e-05
