# Supplementary material for: Cathepsin D in prawn reproductive system: its localization and function in actin degradation
Source: PeerJ. 2020 Nov 11;8:e10218. doi: 10.7717/peerj.10218 (PMC7666547; doi:10.7717/peerj.10218)
Supplement: Supplemental Information 10 [file peerj-08-10218-s010.xlsx]

## Sheet: Sheet1
Figure 5D
Relative band intensity
	Arbitrary units
SH-SY5Y+TE	18576.6
SH-SY5Y+TE+Pep-A	27522.9
SH-SY5Y+Tsp	20175
SH-SY5Y+Tsp+Pep-A	26516.2
SH-SY5Y+CAT-D	18571.4
SH-SY5Y+CAT-D+Pep-A	34916.9
SH-SY5Y+PBS	38596.4
TE	0
Tsp	0
